# Supplementary material
Source: PubMed Central journal article supplement (PMC3209486)

Figure S1

## Normalized Demand Curves

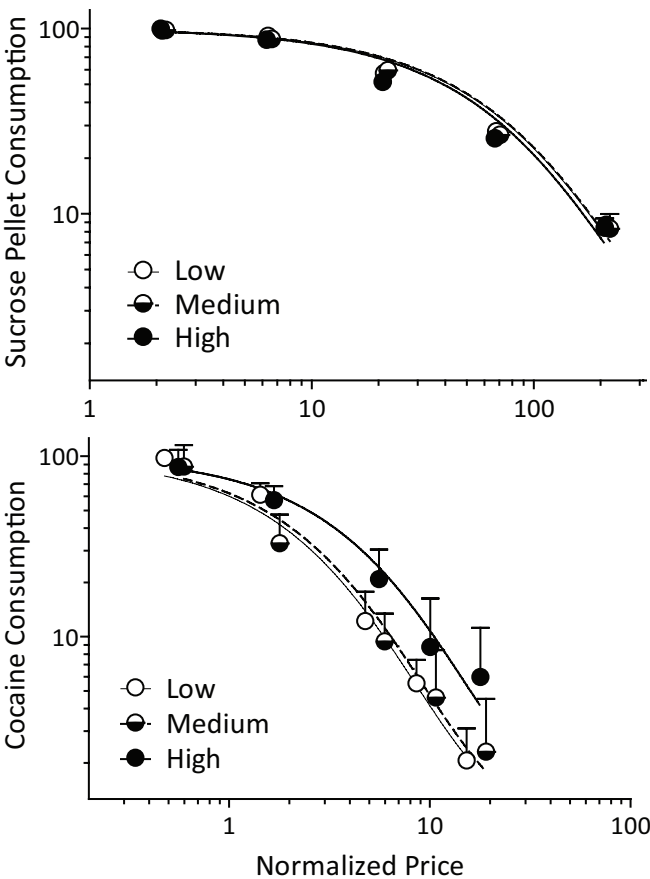

Supplement: NIHMS302851-supplement-Supp_Fig_S1.pdf [file NIHMS302851-supplement-Supp_Fig_S1.pdf]

Figure S2

## Discounting Reassessment

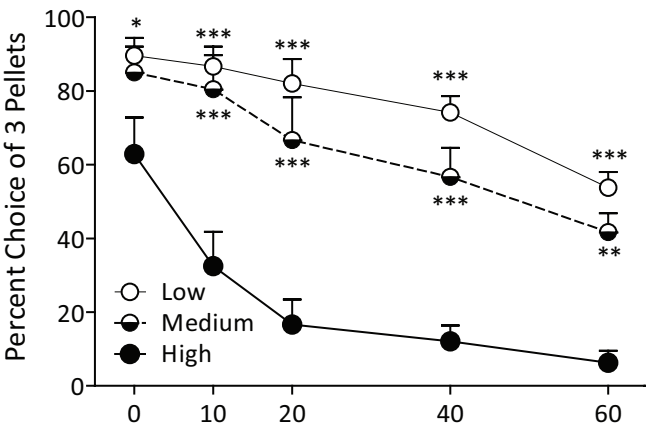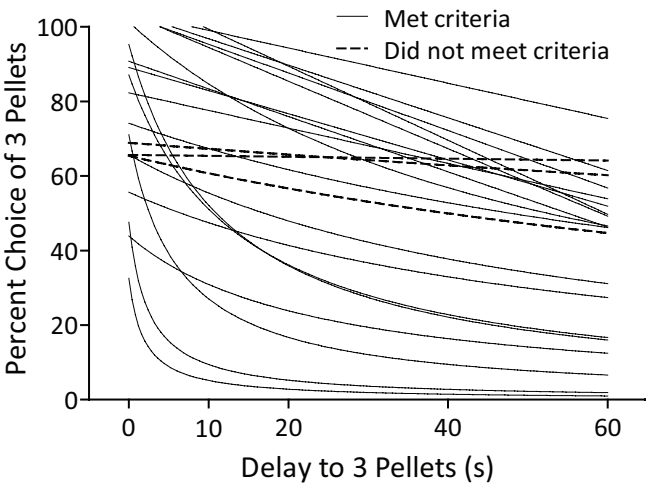

Supplement: NIHMS302851-supplement-Supp_Fig_S2.pdf [file NIHMS302851-supplement-Supp_Fig_S2.pdf]

Figure S3

## Normalized Demand Discounting Reassessment Groups

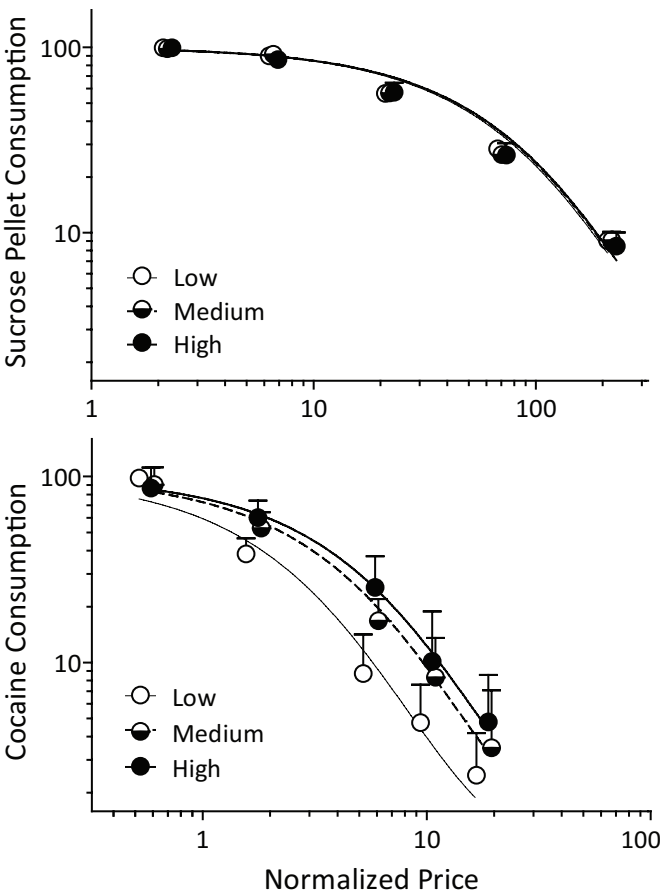

Supplement: NIHMS302851-supplement-Supp_Fig_S3.pdf [file NIHMS302851-supplement-Supp_Fig_S3.pdf]
